# Supplementary material
Source: publisher figshare collection journal article supplement (https://frontiersin.figshare.com/ndownloader/files/22319478)
Supplement: Supplementary file [file 22319478]

## *Supplementary Material*

**Table S1.** Raw data of the limiting dilution assay. Experiments were conducted as described in **Figure 2D**. Shown are the number of populations tested and the number of assays giving positive transplantation ( $\geq 0.5\%$  engraftment).

| Dose | Number of populations tested | Number of positive populations | Group |
|------|------------------------------|--------------------------------|-------|
| 250  | 5                            | 4                              | PBS   |
| 500  | 3                            | 3                              | PBS   |
| 1000 | 4                            | 4                              | PBS   |
| 250  | 5                            | 2                              | HIEC  |
| 500  | 5                            | 2                              | HIEC  |
| 1000 | 5                            | 3                              | HIEC  |
| 4000 | 5                            | 5                              | HIEC  |
| 8000 | 5                            | 5                              | HIEC  |

**Table S2.** Calculation of the percentage of functional HSCs in the bone marrow mononuclear cells (BMMCs) in PBS-treated and HIEC-challenged mice. LSK cell percentage in BMMCs (mean  $\pm$  SD) was calculated as described in **Figure 1C**. HSC frequency in LSK cells was calculated as described in **Figure 2D-F**. Percentage of HSCs in BMMCs (mean  $\pm$  SD) was calculated accordingly.

| Group | LSK cell percentage in BMMC (%) (mean $\pm$ SD) | HSC frequency in LSK cells | Percentage of HSC in BMMC (%) (mean $\pm$ SD) |
|-------|-------------------------------------------------|----------------------------|-----------------------------------------------|
| PBS   | 0.14 $\pm$ 0.03%                                | 1/140                      | 9.67 $\pm$ 1.85 $\times 10^{-4}$              |
| HIEC  | 1.00 $\pm$ 0.08%                                | 1/852                      | 11.75 $\pm$ 0.98 $\times 10^{-4}$             |

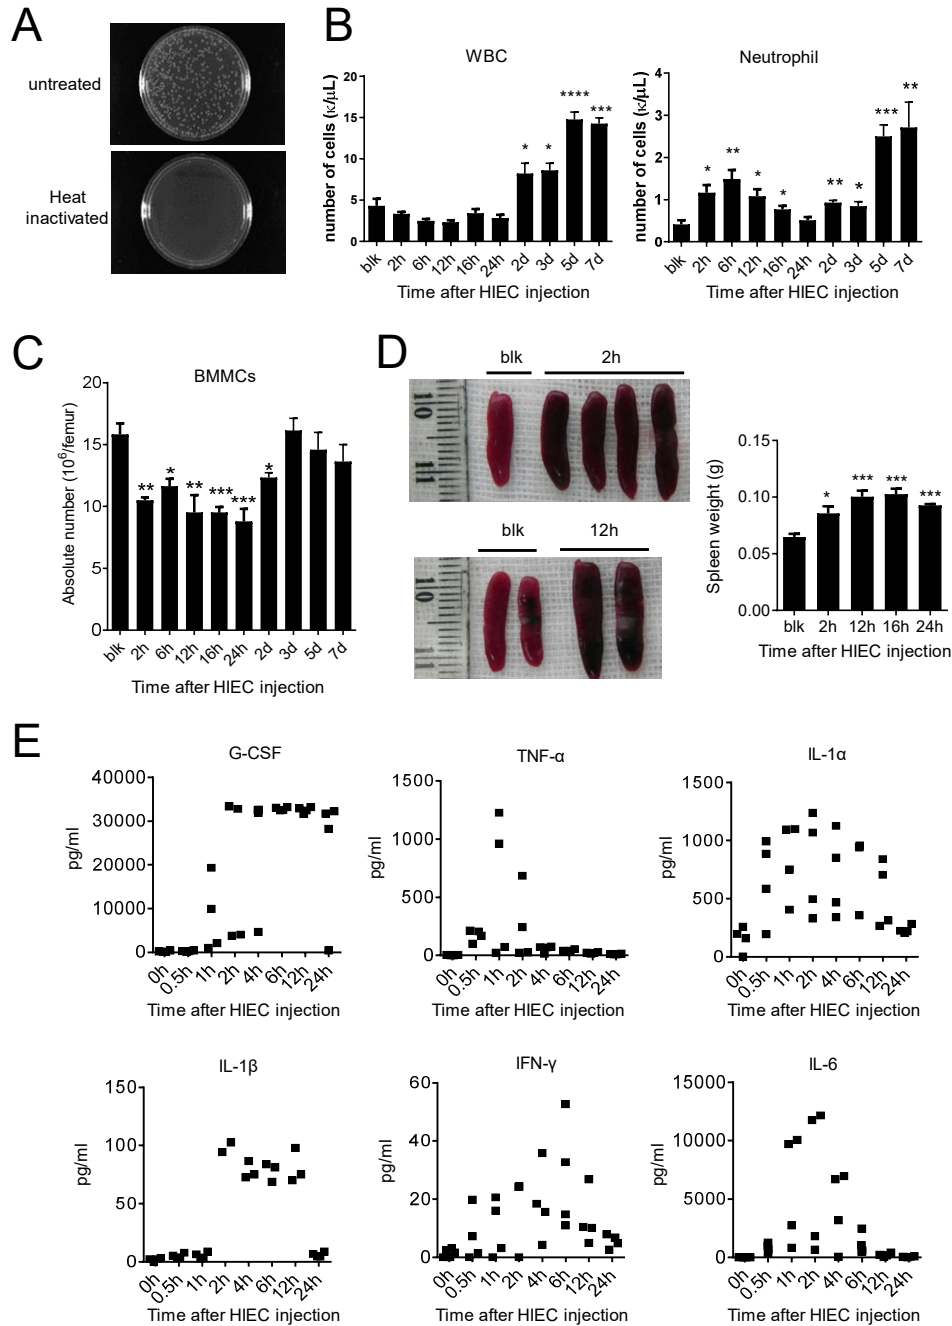

**Figure S1.** (A) Heat inactivated *E. coli* (HIEC) lost proliferation capability. (B) Absolute number of WBCs and neutrophils in the peripheral blood at different time points after HIEC challenge. Data shown are means  $\pm$  SD (n = 5 mice). \*p < 0.05, \*\*p < 0.01, \*\*\*p < 0.001, \*\*\*\*p < 0.0001 versus untreated mice (blk). (C) Absolute number of BM mononuclear cells at different time points after HIEC challenge. Data shown are means  $\pm$  SD (n = 5 mice). \*p < 0.05, \*\*p < 0.01, \*\*\*p < 0.001, \*\*\*\*p < 0.0001 versus untreated mice (blk). (D) HIEC-elicited acute infection induces splenomegaly. Data shown are means  $\pm$  SD (n = 5 mice). \*p < 0.05, \*\*p < 0.01, \*\*\*p < 0.001, \*\*\*\*p < 0.0001 versus untreated mice (blk). (E) Cytokine production in HIEC-challenged mice. The levels of indicated cytokines in the serum were measured at each indicated time points. Four mice were used for each data point.

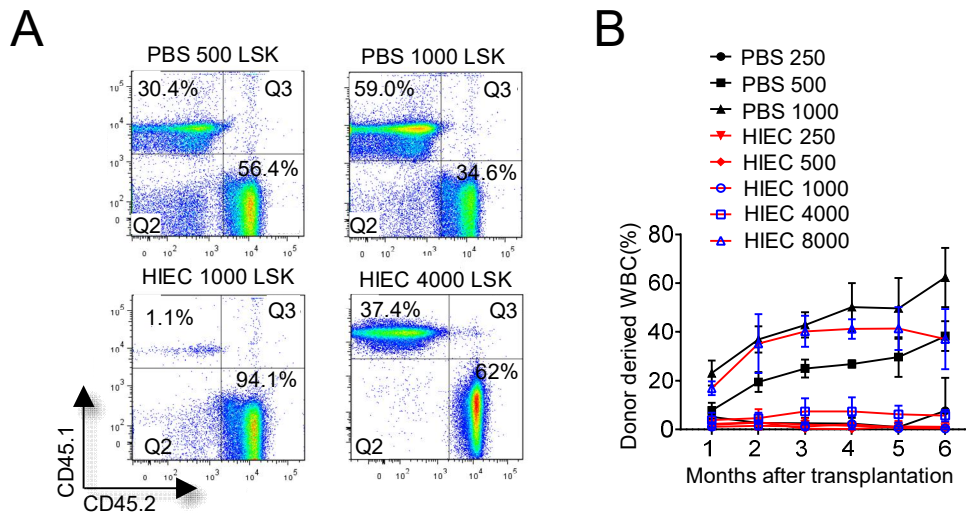

**Figure S2. Limiting dilution analyses (LDA) to assess the frequency of functional HSCs (competitive repopulating units, or CRU) in LSK cell population.** The experiment was conducted as described in Figure 2D. (A) Representative FACS plots showing the percentage of CD45.1<sup>+</sup> donor-derived WBCs in the peripheral blood six months after transplantation. (B) The percentage of CD45.1<sup>+</sup> donor-derived WBCs in the peripheral blood at the indicated time points. Data shown are means  $\pm$  SD of  $n = 5$  mice.

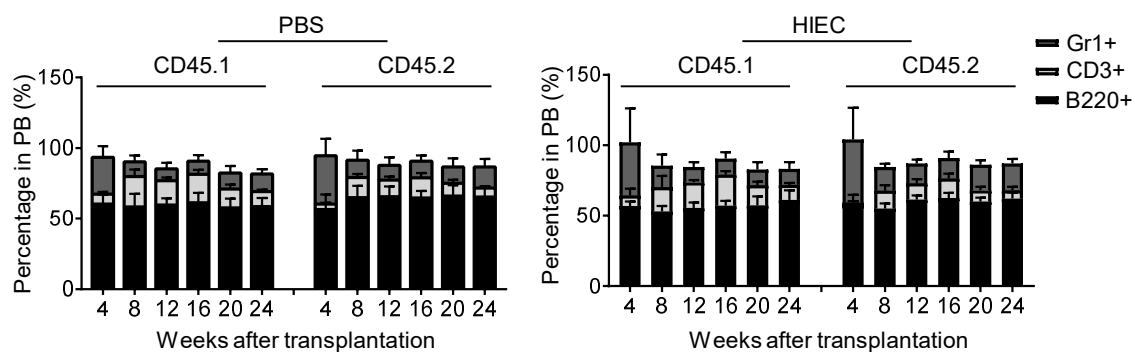

**Figure S3.** The percentage of donor-derived CD45.2<sup>+</sup> and CD45.1<sup>+</sup> cells in indicated blood lineages in the PB of primary recipients at the indicated time points. The experiment was conducted as described in **Figure 3**. Data shown are mean  $\pm$  SD of  $n = 5$  mice.

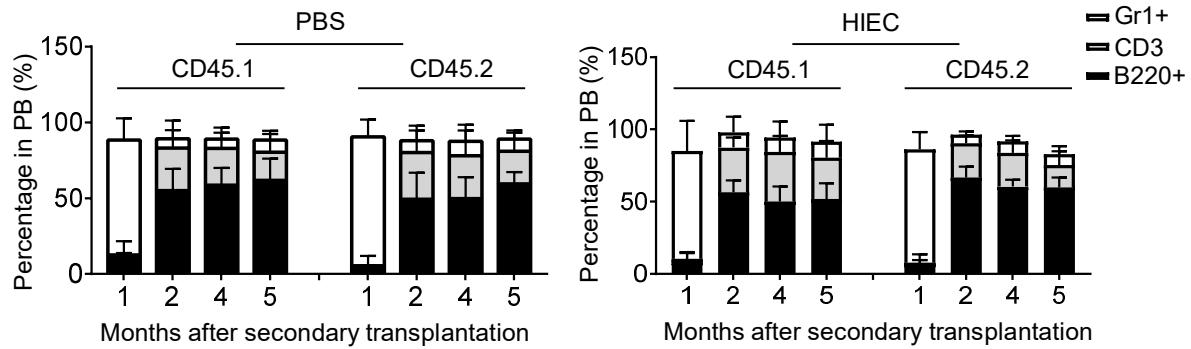

**Figure S4.** The percentage of donor-derived CD45.2<sup>+</sup> and CD45.1<sup>+</sup> cells in the indicated blood lineages in the PB of the secondary recipients at the indicated time points. The experiment was conducted as described in **Figure 4**. Data shown are mean  $\pm$  SD of  $n = 5$  mice.
